# Supplementary material for: Tdp-25 Routing to Autophagy and Proteasome Ameliorates its Aggregation in Amyotrophic Lateral Sclerosis Target Cells
Source: PubMed Central journal article supplement (PMC6098007; doi:10.1038/s41598-018-29658-2), 2018-08-17
Supplement: 41598_2018_29658_MOESM1_ESM.pdf [file 41598_2018_29658_MOESM1_ESM.pdf]

## Supplementary Data File

### Title:

**TDP-25 ROUTING TO AUTOPHAGY AND PROTEASOME AMELIORATES ITS AGGREGATION IN AMYOTROPHIC LATERAL SCLEROSIS TARGET CELLS.**

### Authors:

*Maria Elena Cicardi<sup>1</sup>, Riccardo Cristofani<sup>1</sup>, Paola Rusmini<sup>1</sup>, Marco Meroni<sup>1</sup>, Veronica Ferrari<sup>1</sup>, Giulia Vezzoli<sup>1</sup>, Barbara Tedesco<sup>1</sup>, Margherita Piccolella<sup>1</sup>, Elio Messi<sup>1</sup>, Mariarita Galbiati<sup>1</sup>, Alessandra Boncoraglio<sup>1</sup>, Serena Carra<sup>2</sup>, Valeria Crippa<sup>1</sup>, Angelo Poletti<sup>1,3§</sup>.*

### Affiliation

<sup>1</sup> Department of Excellence: Dipartimento di Scienze Farmacologiche e Biomolecolari (DiSFeB), Centro di Eccellenza sulle Malattie Neurodegenerative, Università degli Studi di Milano, Milano, (Italy).

<sup>2</sup> Dipartimento di Scienze Biomediche, Metaboliche e Neuroscienze, Università degli Studi di Modena e Reggio Emilia, and Center for Neuroscience and Neurotechnology, Modena, Italy

<sup>3</sup> Centro InterUniversitario sulle Malattie Neurodegenerative, Università degli Studi di Firenze, Genova, Roma Tor Vergata and Milano, Italy

<sup>§</sup> Corresponding authors: Angelo Poletti. Dipartimento di Scienze Farmacologiche e Biomolecolari (DiSFeB), Università degli Studi di Milano - Via Balzaretti 9, 20133 Milano (Italy). ph. +39-02-50318215; fax: +39-02-50318204\_ e-mail: <angelo.poletti@unimi.it>

## FIGURE S1

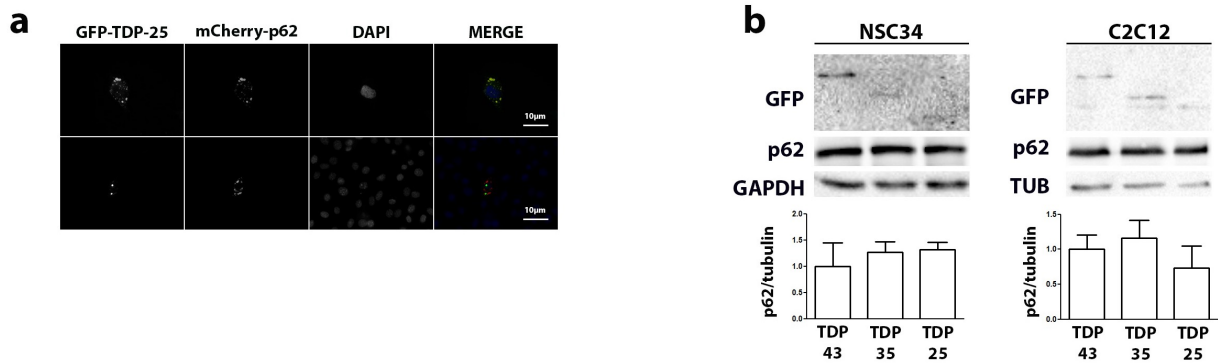

Figure S1: p62 localization and levels upon GFP-TDP-25 expression.

(a) Microscopy analysis. NSC34 and C2C12 were transfected with GFP-TDP-25 and mCherry-p62. Green: GFP-TDP-25. Red: mCherry-p62. Nuclei staining: DAPI. Image were acquired with 63X magnification. (b) NSC34 and C2C12 were transfected with GFP-TDP-43, GFP-TDP35 and GFP-TDP-25. WB shows GFP-TDPs protein levels and p62 protein levels. Tubulin/GAPDH were used as loading control. Graphics show p62 levels quantification normalized on tubulin.

## FIGURE S2

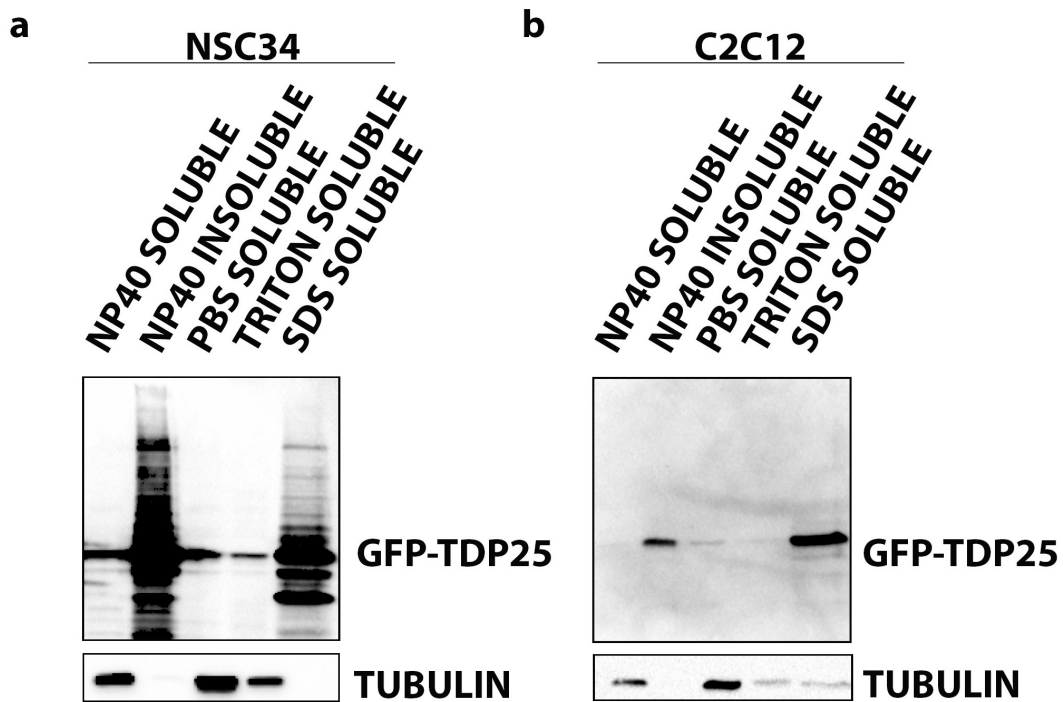

Figure S2: Comparison between fractionation and NP-40 extraction.

(a) Western Blot shows both extracts of fractionation and extracts from NP-40 extraction of NSC34 transiently overexpressing GFP-TDP-25. (b) Western Blot shows both extracts of fractionation and extracts from NP-40 extraction of C2C12 transiently overexpressing GFP-TDP-25.

# FIGURE S3

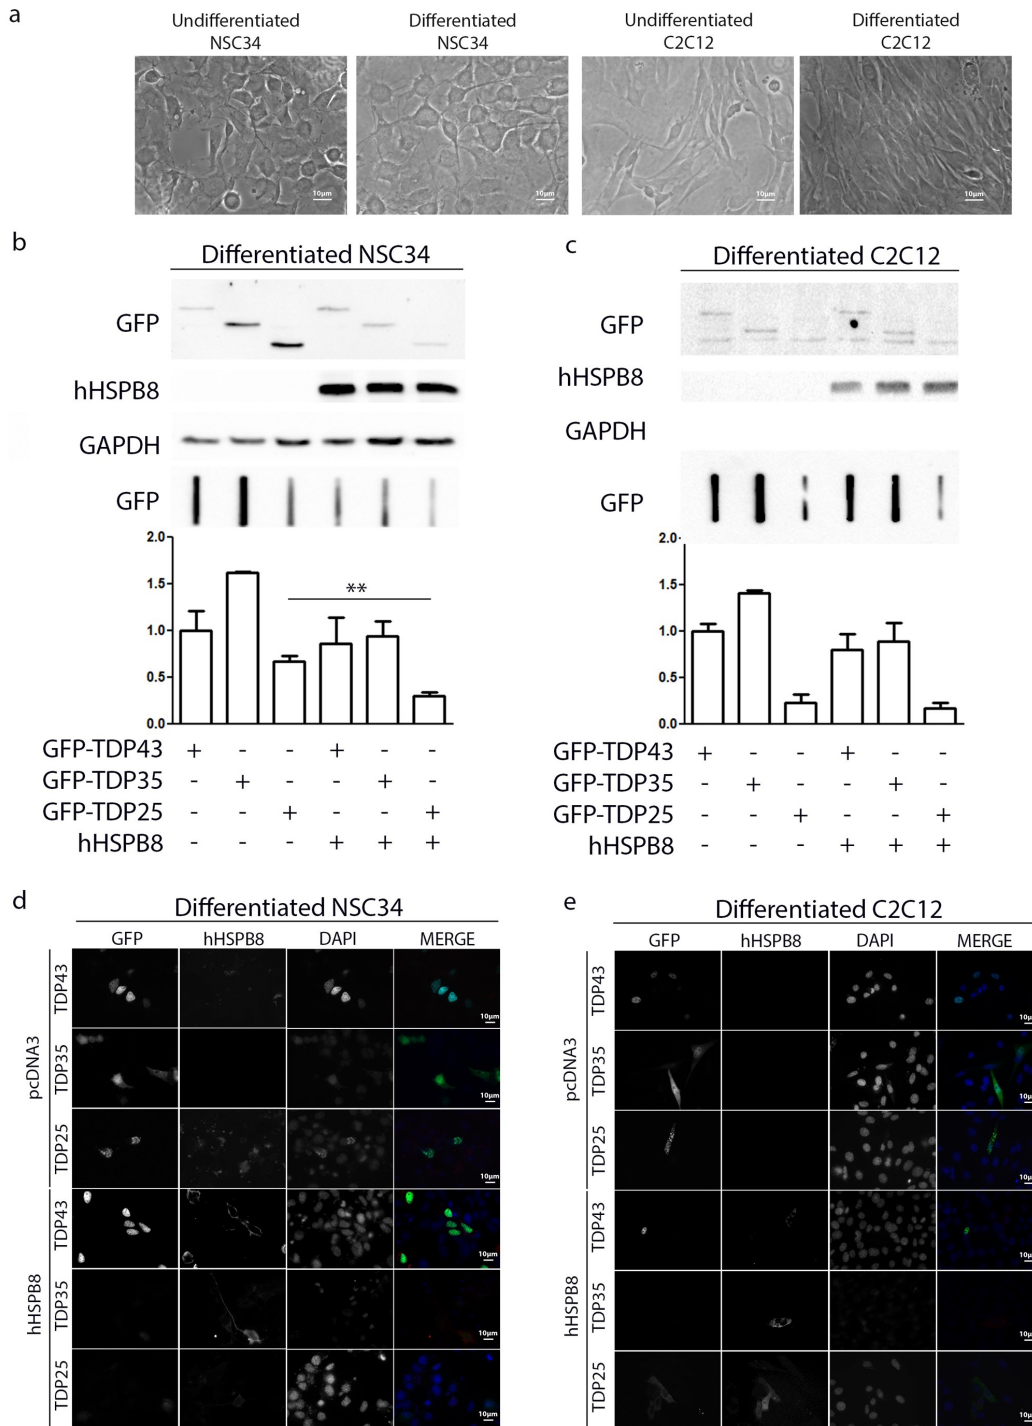

Figure S3: HspB8 pro-degradative activity in differentiated NSC34 and C2C12.

(a) bright field acquisition of undifferentiated and differentiated NSC34 and C2C12 cells. 32X magnification.

(b) Microscope analysis. Differentiated NSC34 transiently overexpressing GFP-TDP-43, GFP-TDP-35 and GFP-TDP-25, and co-transfected with pCI-HspB8 or pcDNA3 as control vector. 63X magnification. Green: GFP-TDPs; Red: hHspB8; nuclei staining: DAPI.

(c) Microscope analysis. Differentiated C2C12 transiently overexpressing GFP-TDP-43, GFP-TDP-35 and GFP-TDP-25, and co-transfected with pCI-HspB8 or pcDNA3 as control vector. 63X magnification. Green: GFP-TDPs; Red: hHspB8; nuclei staining: DAPI.

(d) Differentiated NSC34 transiently overexpressing GFP-TDP-43, GFP-TDP-35 and GFP-TDP-25. Upper inset shows PBS extracts WB analysis. Middle inset shows PBS extracts FRA analysis. Lower inset shows quantification of FRA analysis (\* p<0,05).

(e) Differentiated C2C12 transiently overexpressing GFP-TDP-43, GFP-TDP-35 and GFP-TDP-25. Upper inset shows PBS extracts WB analysis. Middle inset shows PBS extracts FRA analysis. Lower inset shows quantification of FRA analysis.

**FIGURE S4**

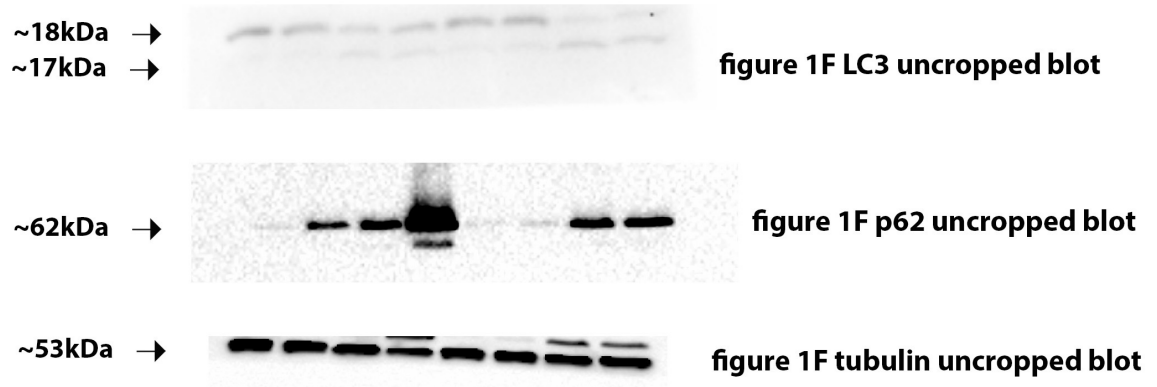

Figure S4: Uncropped Western Blot from Figure 1F.  
Blots were halved in order to process the membrane against different antibodies, so the entire blots are not available.

**FIGURE S5**

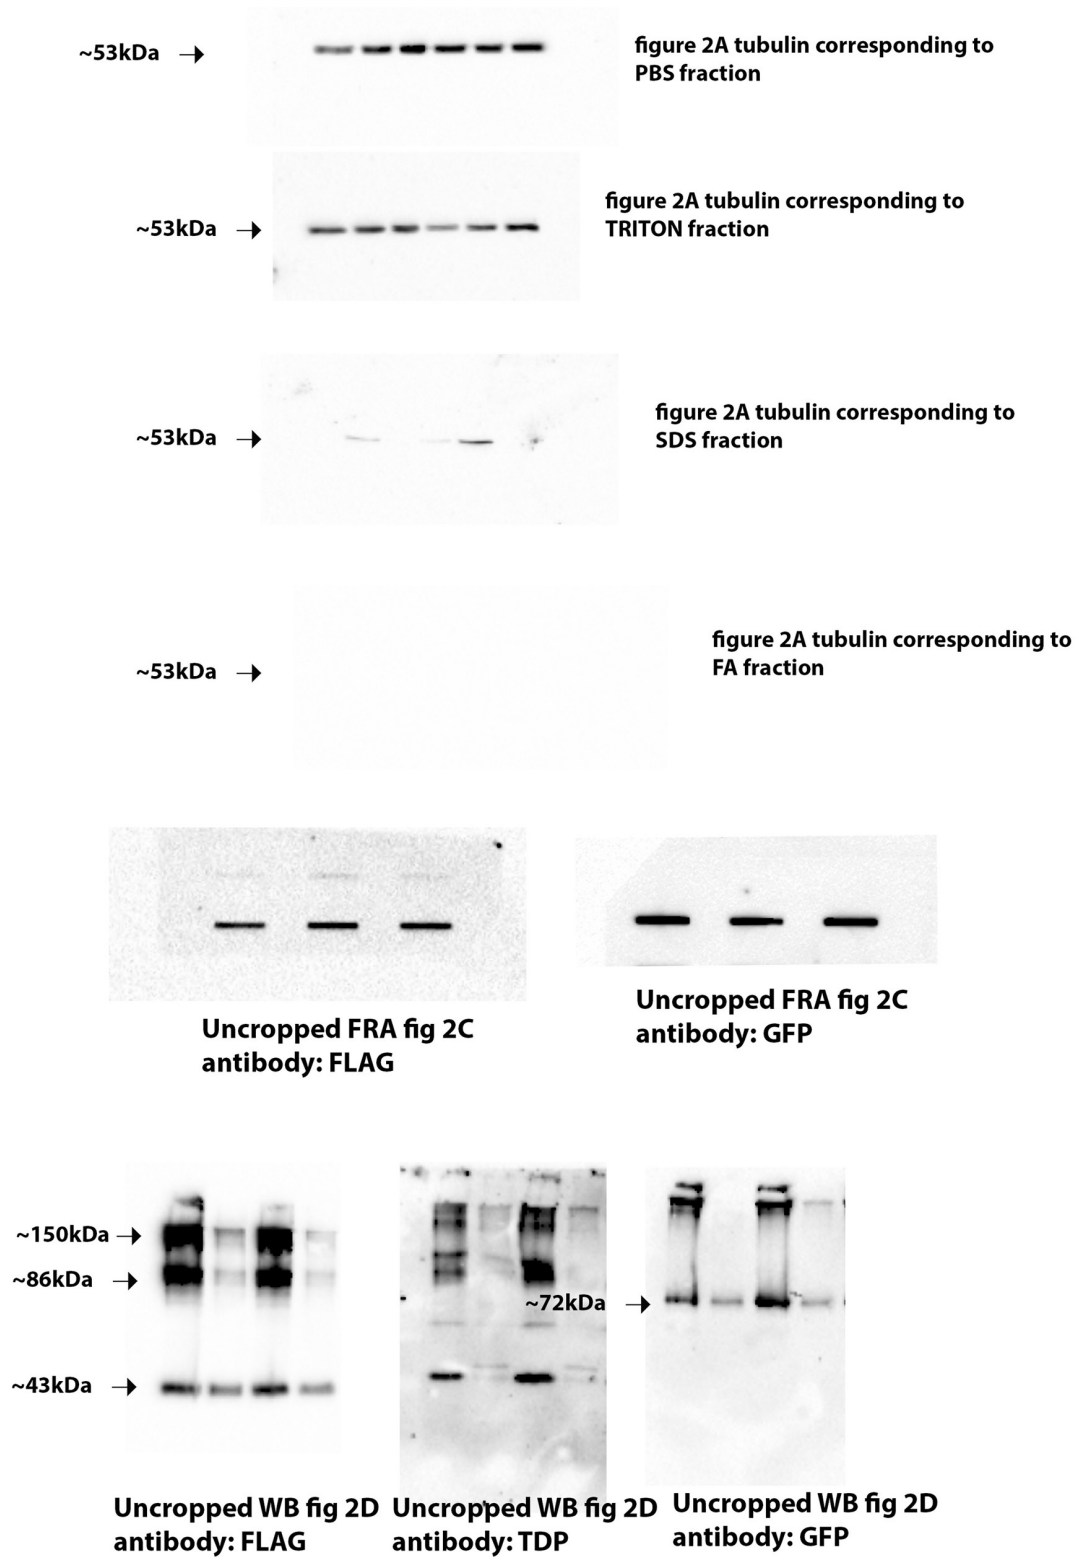

Figure S5: Uncropped Western Blot and Filter Retardation Assay from Figure 2 A, C, D. Blots were halved in order to process the membrane against different antibodies, so the entire blots are not available.

**FIGURE S6**

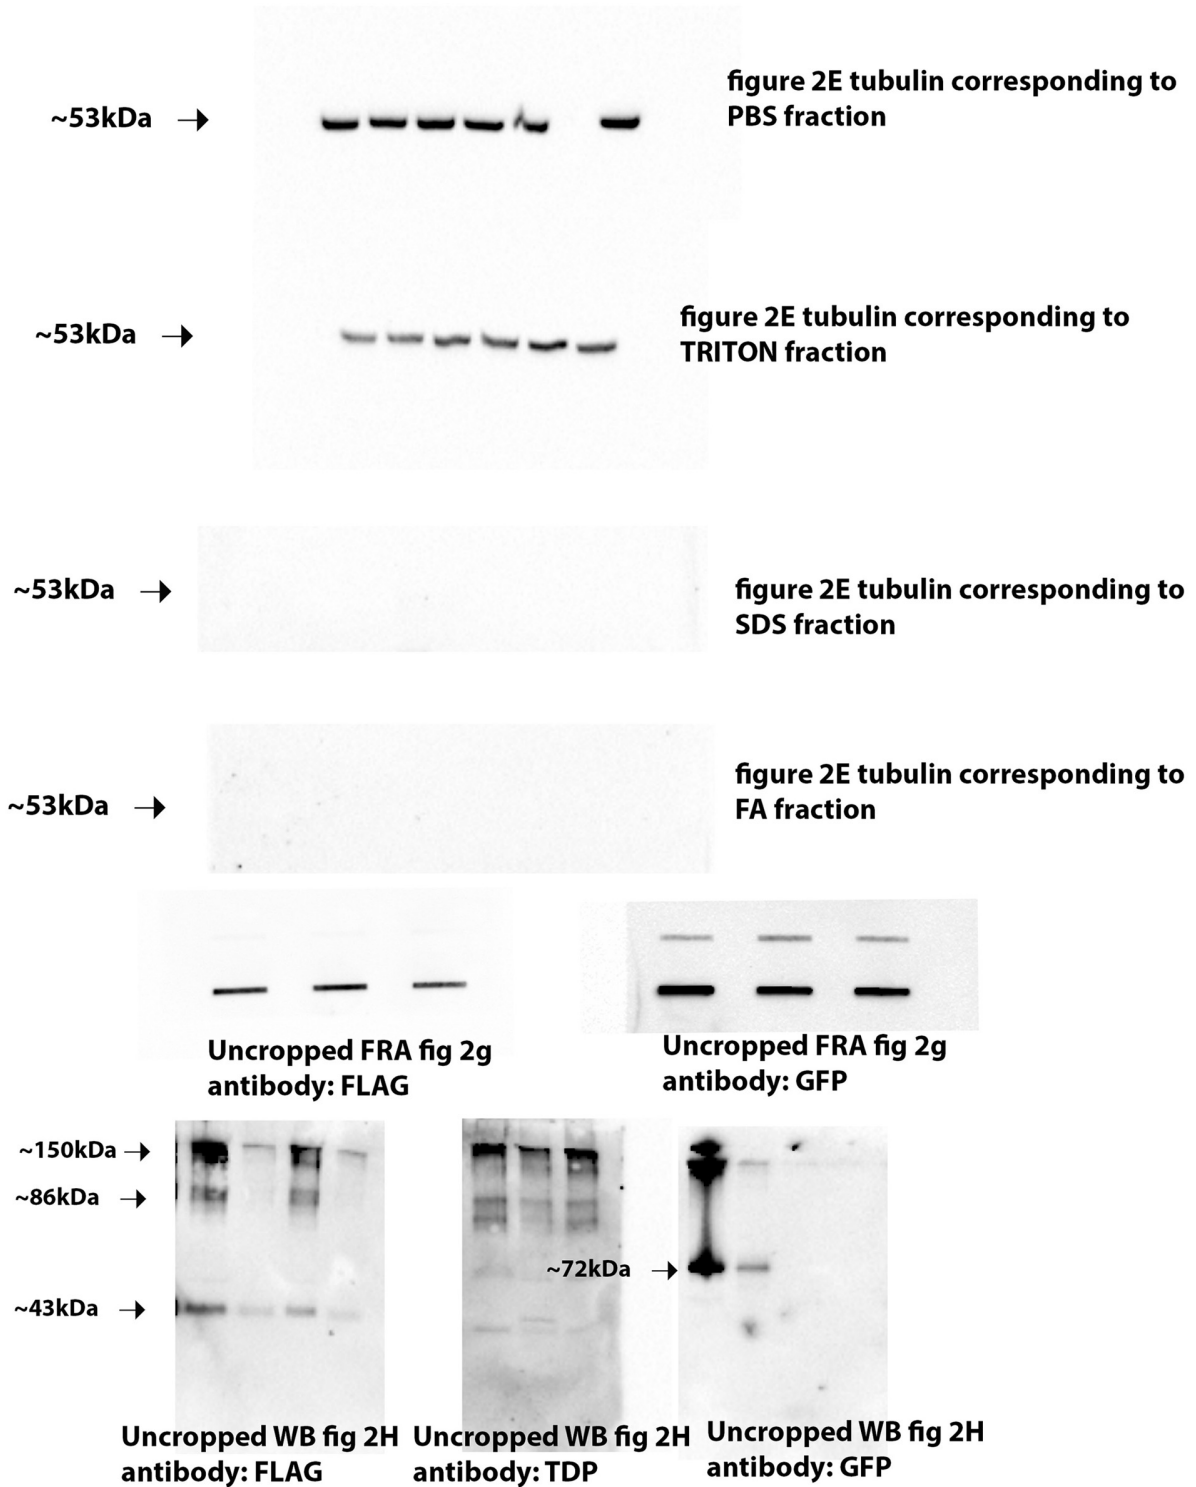

Figure S6: Uncropped Western Blot and Filter Retardation Assay from Figure 2 E, G, H. Blots were halved in order to process the membrane against different antibodies, so the entire blots are not available.

**FIGURE S7**

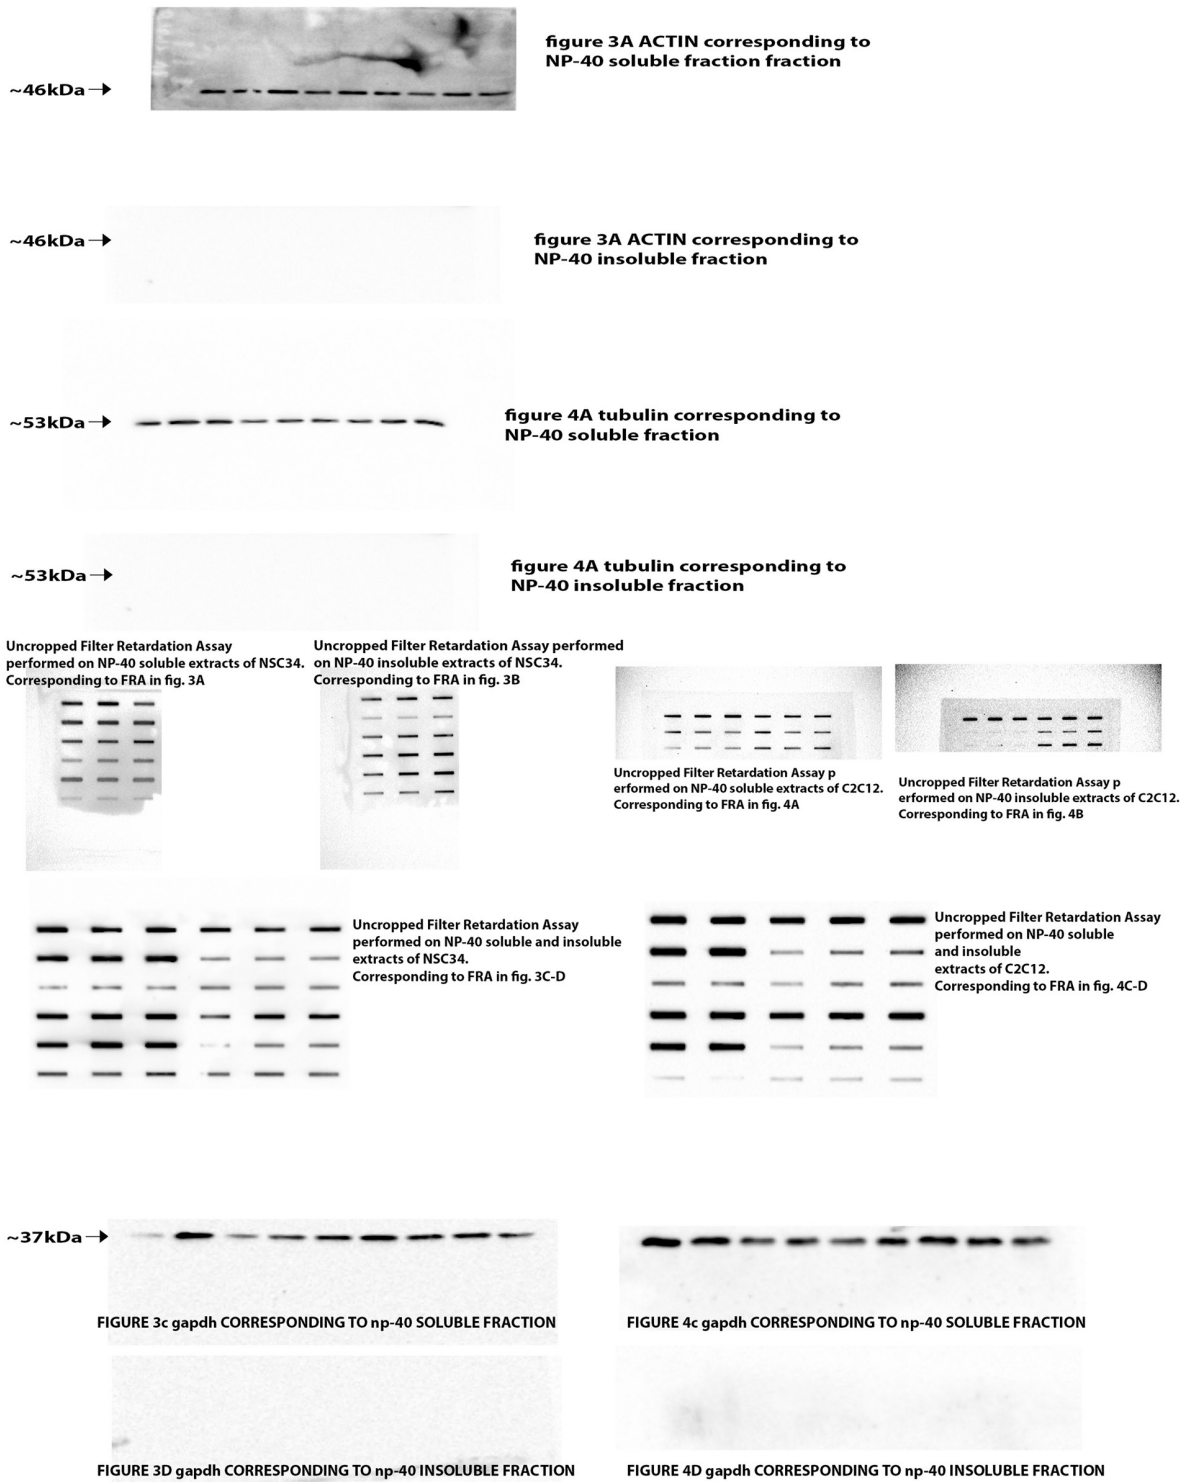

Figure S7: Uncropped Western Blot and Filter Retardation Assay from Figure 3 and Figure 4. Blots were halved in order to process the membrane against different antibodies, so the entire blots are not available.

## FIGURE S8

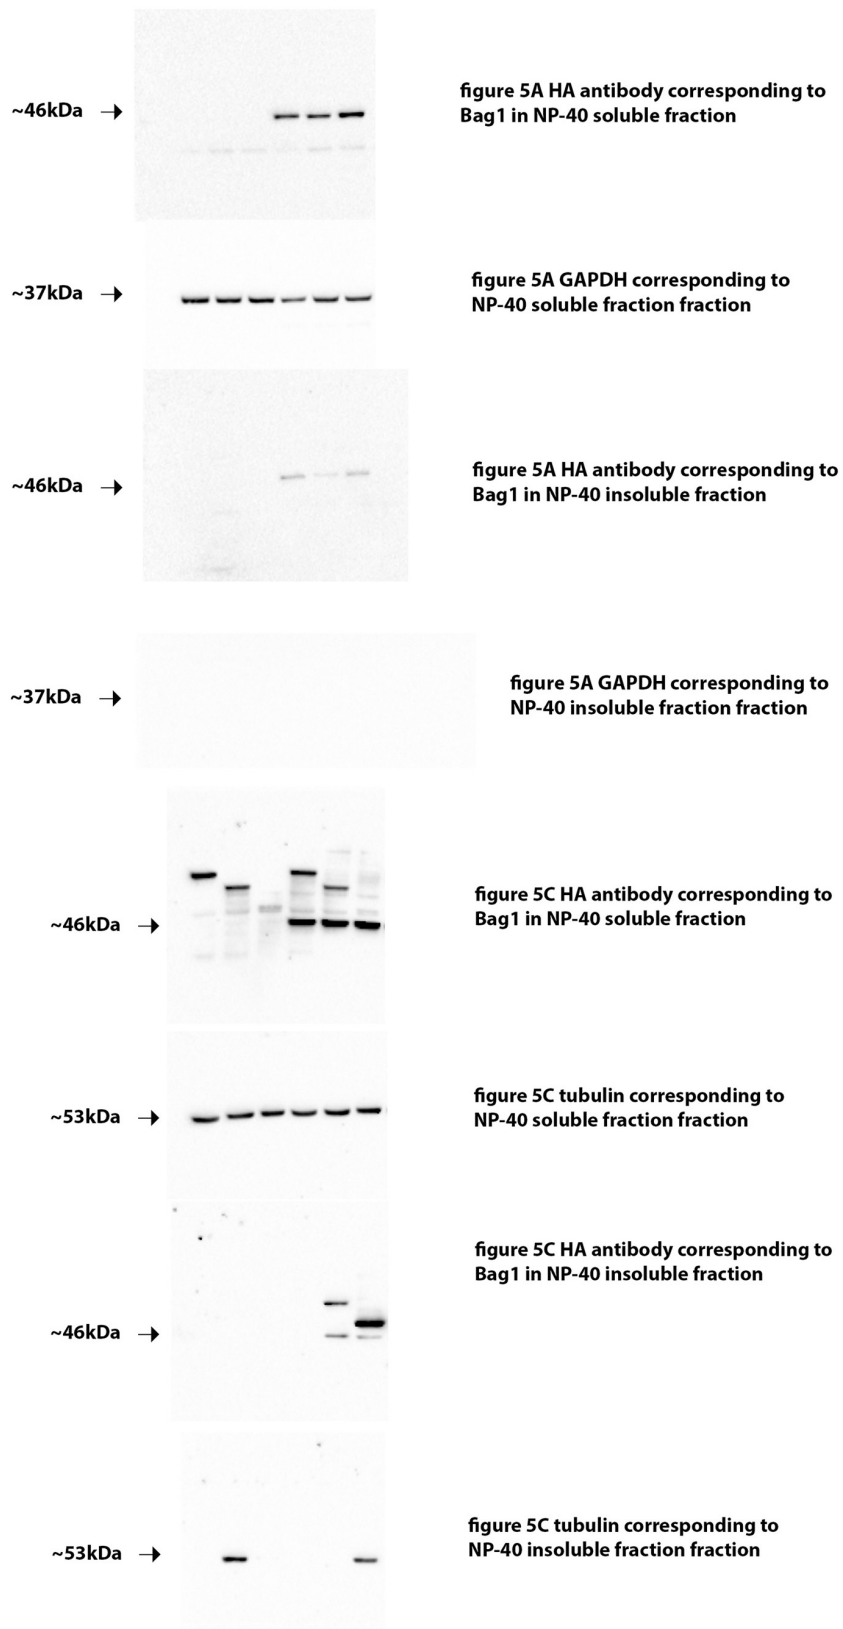

Figure S8: Uncropped Western Blot from Figure 5.

Blots were halved in order to process the membrane against different antibodies, so the entire blots are not available.



**FIGURE S9**

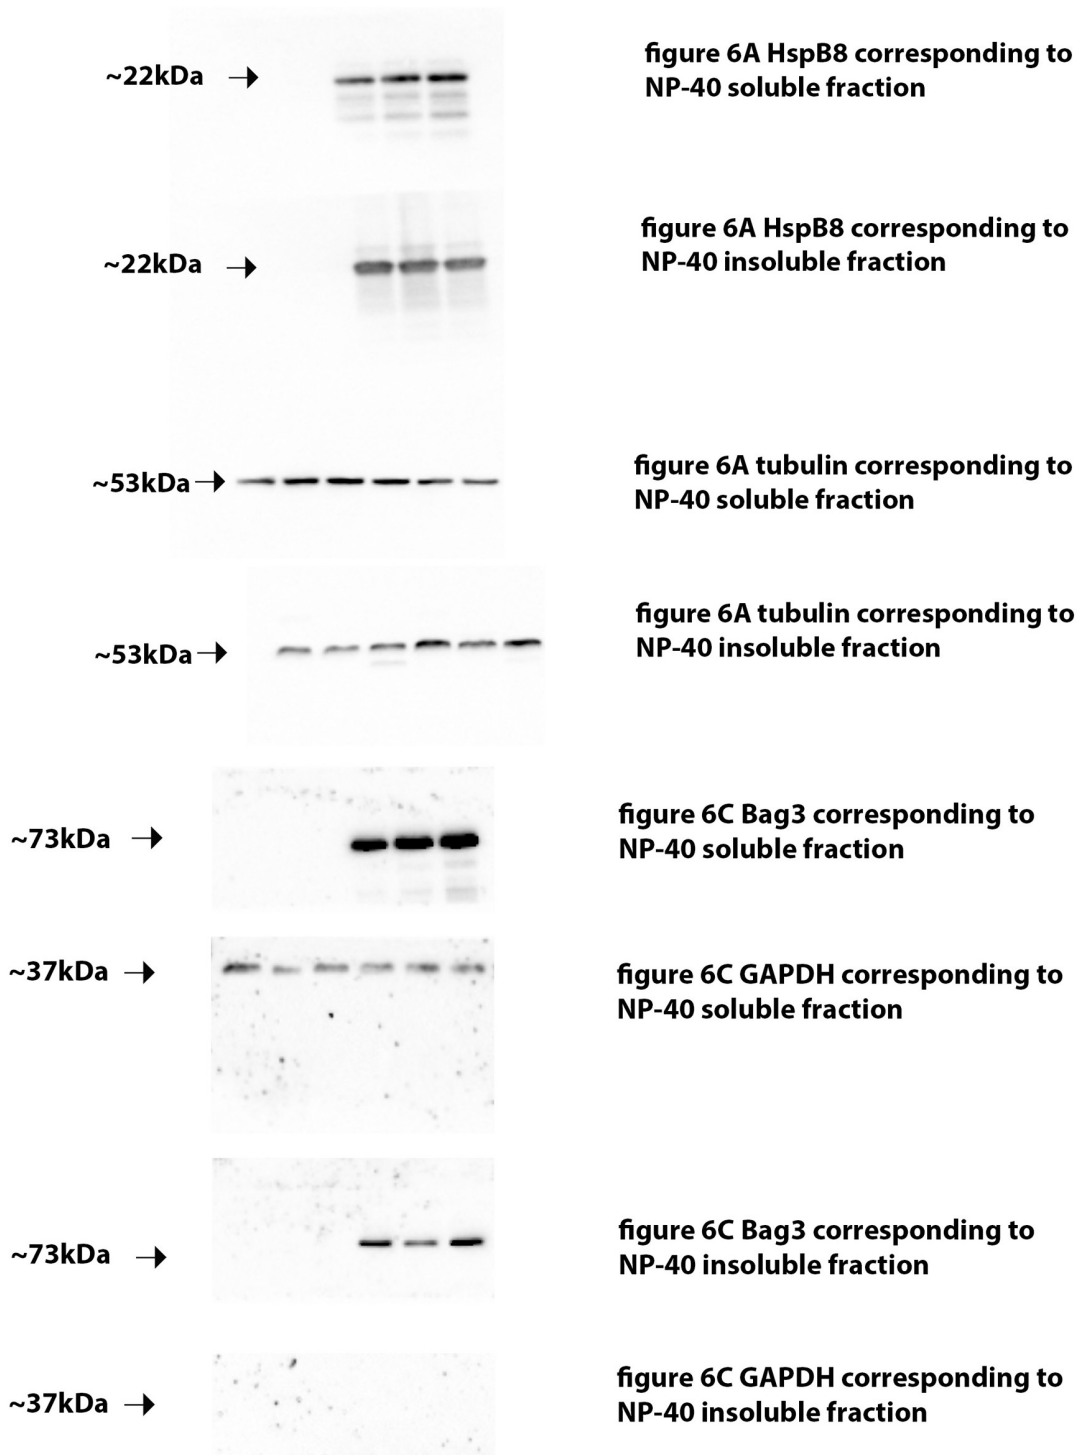

Figure S9: Uncropped Western Blot from Figure 6.

Blots were halved in order to process the membrane against different antibodies, so the entire blots are not available.

**FIGURE S10**

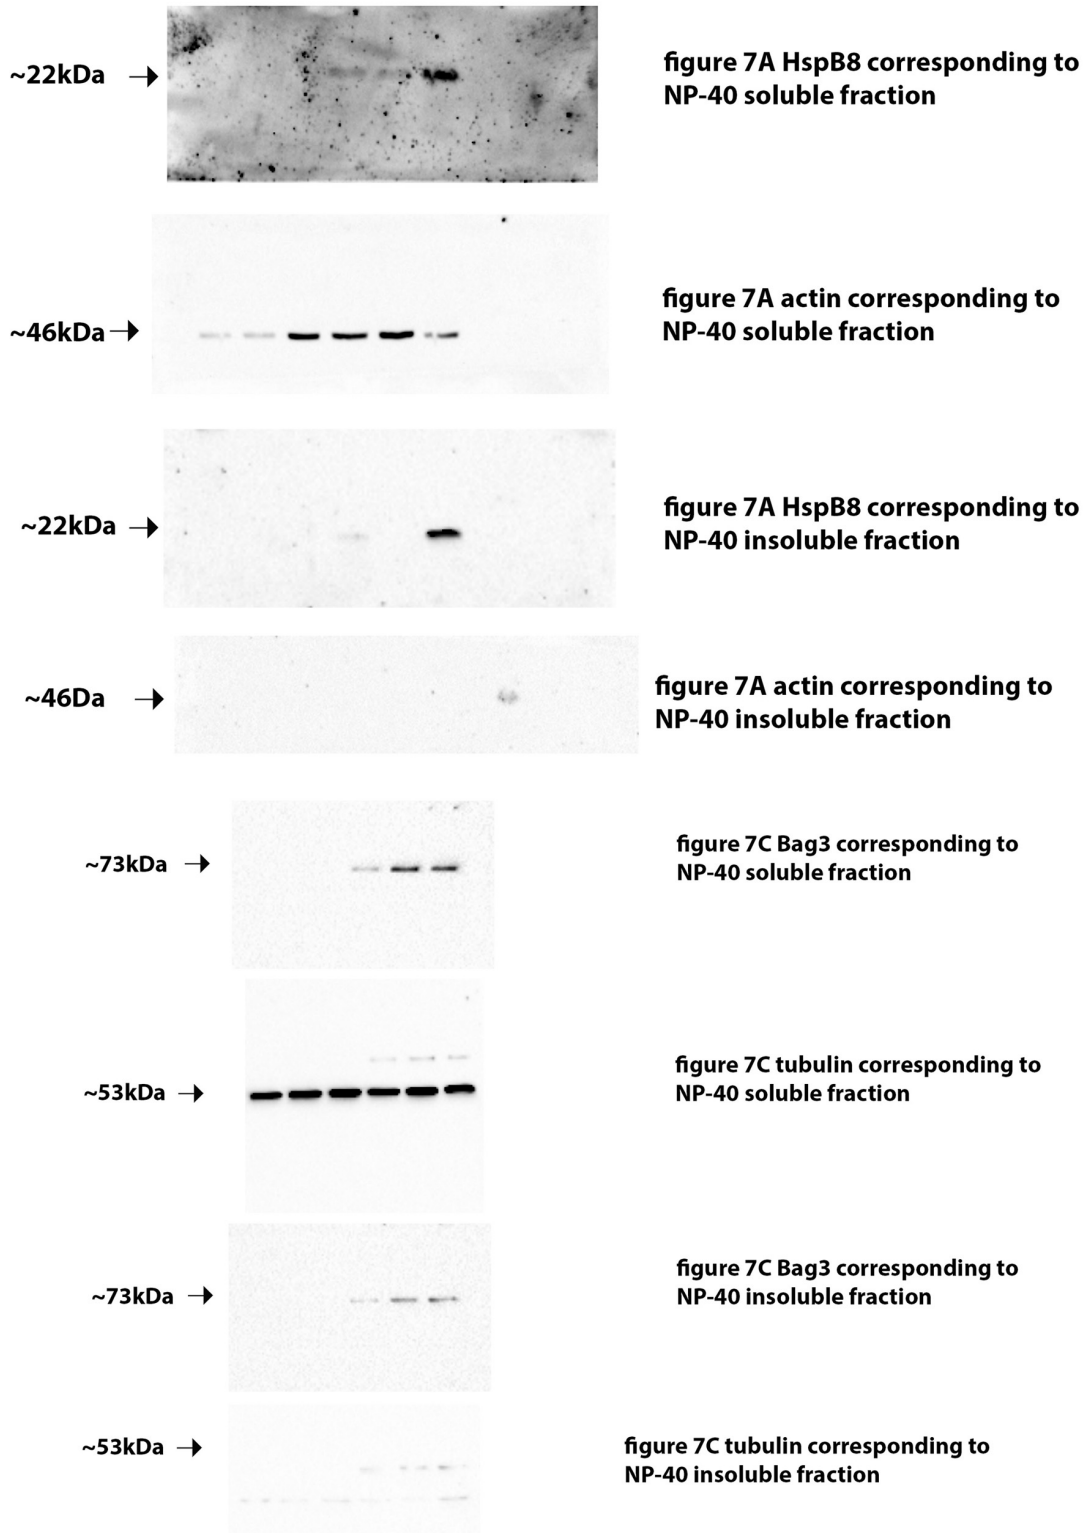

Figure S10: Uncropped Western Blot from Figure 7.  
Blots were halved in order to process the membrane against different antibodies, so the entire blots are not available.
